# Supplementary material for: Dietary amino acids and the odds of metabolic dysfunction-associated fatty liver disease (MAFLD) among overweight and obese children and adolescents: A principal component analysis approach
Source: Research Square preprint supplement (doi:10.21203/rs.3.rs-6687463/v1), 2025-05-29
Supplement: Supplementary file 1 [file 3222aee5d4844ef93ffe61d3.docx]

| **Supplementary Table 1.** Dietary intake of amino acids in different forms in the entire population and comparison of dietary intake of amino acids as a percentage of protein intake between two groups of healthy individuals and individuals with metabolic dysfunction-associated fatty liver disease*. | | | | | | | | |
| --- | --- | --- | --- | --- | --- | --- | --- | --- |
| Amino Acids | Grams Intake | Percentage of Total Protein | Percentage of Total Energy Intake | Percentage of Total Animal Protein | Percentage of Total Plant Protein | Percent of total protein† | | |
| MAFLD | | Without MAFLD |
| Valine | 5.60±1.94 | 5.49±0.32 | 0.73±0.14 | 57.8 | 42.2 | 5.50±0.34 | 5.48±0.31 | |
| Leucine | 8.02±2.81 | 7.84±0.35 | 1.05±0.19 | 57.7 | 42.3 | 7.87±0.37 | 7.83±0.33 | |
| Isoleucine | 4.64±1.65 | 4.53±1.18 | 0.61±0.11 | 58.5 | 41.5 | 4.55±0.19 | 4.52±0.18 | |
| Phenylalanine | 4.78±1.65 | 4.68±0.17 | 0.63±0.10 | 51.6 | 48.4 | 4.69±0.18 | 4.68±0.16 | |
| Tyrosine | 3.62±1.28 | 3.55±0.23 | 0.47±0.09 | 60.8 | 39.2 | 3.56±0.24 | 3.54±0.22 | |
| Tryptophan | 1.18±0.43 | 1.15±0.06 | 0.15±0.02 | 48.0 | 52.0 | 1.14±0.06 | 1.15±0.07 | |
| Cysteine | 1.54±0.59 | 1.50±0.16 | 0.20±0.03 | 42.2 | 57.8 | 1.51±0.15 | 1.49±0.16 | |
| Methionine | 2.21±0.80 | 2.16±0.15 | 0.29±0.06 | 64.3 | 35.7 | 2.18±0.14 | ‡2.14±0.15 | |
| Glutamic Acid | 22.04±8.01 | 21.60±1.73 | 2.89±0.49 | 49.6 | 50.4 | 21.74±1.69 | 21.50±1.75 | |
| Aspartic Acid | 8.98±3.10 | 8.83±0.71 | 1.18±0.20 | 49.3 | 50.7 | 8.71±0.59 | ‡8.91±0.77 | |
| Lysine | 6.33±2.40 | 6.17±0.65 | 0.83±0.19 | 68.8 | 31.2 | 6.16±0.66 | 6.17±0.64 | |
| Histidine | 2.58±0.92 | 2.52±0.11 | 0.34±0.06 | 55.8 | 44.2 | 2.52±0.11 | 2.53±0.11 | |
| Arginine | 5.45±1.99 | 5.33±0.52 | 0.71±0.13 | 44.5 | 55.5 | 5.24±0.46 | ‡5.39±0.54 | |
| Serine | 5.11±1.74 | 5.02±0.27 | 0.67±0.12 | 54.2 | 45.8 | 5.03±0.28 | 5.01±0.27 | |
| Threonine | 3.81±1.35 | 3.73±0.17 | 0.50±0.09 | 57.5 | 42.5 | 3.73±0.16 | 3.73±0.17 | |
| Alanine | 4.52±1.63 | 4.41±0.24 | 0.59±0.11 | 54.7 | 45.3 | 4.41±0.24 | 4.41±0.25 | |
| Glycine | 3.89±1.51 | 3.78±0.33 | 0.50±0.09 | 48.5 | 51.5 | 3.77±0.32 | 3.78±0.33 | |
| Proline | 7.65±2.81 | 7.50±0.75 | 1.00±0.19 | 52.2 | 47.8 | 7.42±0.75 | ‡7.62±0.73 | |
| *Dietary intake of amino acids reported as mean and standard deviation or percentage.  †Differences in dietary intake of amino acids as a percentage of total protein between the two groups of subjects with MAFLD and healthy subjects were assessed using an independent t-test.  ‡There was a significant difference between the dietary intake of amino acids (as a percentage of total protein) between the two groups of subjects with MAFLD and healthy subjects (P-value <0.05). | | | | | | | | |

| **Supplementary Table 2.** Correlation coefficient of dietary amino acid patterns with food groups and micronutrients. | | | |
| --- | --- | --- | --- |
|  | Pattern 1 | Pattern 2 | Pattern 3 |
| **Food Sources*** |  | | |
| Total Foods from Animal Sources | 0.675† | 0.137† | -0.306† |
| Dairy (g/day) | 0.630† | 0.201† | -0.344† |
| Red Meat (g/day) | 0.194† | 0.340† | 0.013† |
| Processed Red Meat (g/day) | 0.078 | 0.188† | 0.057 |
| Fish, Poultry and Eggs (g/day) | 0.198† | -0.380 | 0.154† |
| Total Foods from Plant Sources (g/day) | 0.185† | -0.064 | 0.199† |
| Grains (g/day) | -0.297 | 0.180† | 0.395† |
| Legumes (grams per day) | -0.005 | -0.039 | 0.208† |
| Nuts (grams per day) | 0.021 | -0.233† | 0.181† |
| Fruits and Vegetables (g/day) | -0.027 | -0.136† | -0.417† |
| **Nutrient Intake**** |  | | |
| Total Protein (% of Energy Intake) | 0.431† | -0.023 | 0.211† |
| Animal Protein (% of Energy Intake) | 0.671† | -0.149† | -0.079 |
| Plant Protein (% of Energy Intake) | -0.522† | 0.227† | 0.479† |
| Total Fat (% of Energy Intake) | 0.222† | -0.162† | -0.049 |
| Saturated Fatty Acids (% of Energy Intake) | 0.423† | -0.059 | -0.125† |
| Monounsaturated Fatty Acids (% of Energy Intake) | 0.179† | -0.116† | 0.047 |
| Polyunsaturated Fatty Acids (% of Energy Intake) | -0.016 | -0.134† | -0.125† |
| Sodium (mg/1000 kcal) | -0.120† | 0.125† | 0.109† |
| Calcium (mg/1000 kcal) | 0.616† | 0.366† | -0.276† |
| Zinc (mg/ 1000kcal) | 0.324† | 0.096† | 0.322† |
| Magnesium (mg/1000kcal) | -0.030 | 0.218† | 0.211† |
| Fiber (g/1000kcal) | -0.459† | 0.231† | -0.015 |
| *Adjusted for age, sex, body mass index and energy intake  **Adjusted for age, sex and body mass index  † P<0.05 | | | |

| **Supplementary Table 3. C**haracteristics of the participants across quartiles of extracted amino acid patterns*‡ | | | | | | |
| --- | --- | --- | --- | --- | --- | --- |
|  | Pattern 1 | | Pattern 2 | | Pattern 3 | |
| Quartile 1 | Quartile 4 | Quartile 1 | Quartile 4 | Quartile 1 | Quartile 4 |
| Age (years) | 10.4±2.4 | 9.7±2.3† | 10.3±2.4 | 10.1±2.1 | 9.7±2.0 | 10.1±2.3 |
| Sex (male, %) | 50.0 | 57.6 | 52.8 | 56.3 | 47.2 | 57.1 |
| Pubertal status (prepubertal %) | 26.2 | 27.2 | 20.5 | 26.2 | 20.0 | 34.1† |
| Height (cm) | 143.2±12.4 | 141.9±13.0 | 144.2±13.0 | 143.0±11.9 | 142.3±12.6 | 141.3±11.5 |
| Weight (kg) | 51.7±15.1 | 49.1±16.1 | 51.3±14.5 | 51.0±14.9 | 48.9±13.0 | 48.6±12.9 |
| Waist circumference (cm) | 85.4±10.8 | 83.2±11.4† | 84.4±10.4 | 84.3±9.8 | 82.6±10.5 | 83.6±9.8 |
| Body mass index (kg/m2) | 24.8±3.9 | 23.8±4.2 | 24.1±3.6 | 24.5±3.8 | 23.7±3.3 | 24.0±3.8 |
| Body mass index for age z-score | 3.00±1.00 | 2.88±1.00 | 2.77±0.90 | 2.88±1.00 | 2.81±0.89 | 2.83±1.00 |
| Physical activity (MET.h/wk) | 7.5  (2.8-17.3) | 9.5  (3.7-20.9) | 8.6  (3.2-22.2) | 6.9  (2.9-15.0) | 7.9  (2.6-21.9) | 8.8  (3.7-20.5) |
| Passive smoker (%) | 25.4 | 16.0 | 29.9 | 23.8 | 21.7 | 24.8 |
| Fasting blood sugar (mg/dL) | 92.4±8.4 | 89.7±7.5 | 91.4±9.0 | 91.8±8.4 | 91.6±8.6 | 80.7±9.0 |
| Fasting serum insulin (μU/mL) | 16.8±7.6 | 15.3±8.0 | 16.2±8.5 | 17.1±8.9 | 15.7±8.2 | 17.3±9.8 |
| Homeostatic Model Assessment for Insulin Resistance | 3.81±1.76 | 3.43±1.95 | 3.67±2.00 | 3.93±2.24 | 3.57±2.00 | 3.98±2.56 |
| Total cholesterol (mg/dL) | 167.8±31.4 | 168.5±31.9 | 177.5±98.7 | 168.0±29.7 | 168.7±26.3 | 168.4±32.5 |
| High-density lipoprotein cholesterol (mg/dL) | 45.4±10.1 | 47.6±12.0 | 48.1±10.3 | 44.9±12.2 | 48.3±12.1 | 43.4±11.7† |
| Low-density lipoprotein cholesterol (mg/dL) | 99.7±25.8 | 96.9±26.0 | 97.2±26.6 | 98.9±26.1 | 98.4±22.6 | 98.2±29.5 |
| Triglycerides (mg/dL) | 127.0  (82.7-161.7) | 111.0  (87.0-162.0) | 113.0  (90.0-150.0) | 117.0  (86.7-161.0) | 103  (84.5-142.5) | 119.0  (90.5-166.0)† |
| Alanine aminotransferase (IU/L) | 18.0  (12.0-27.2) | 16.5  (12.0-22.0)† | 16.0  (12.0-23.0) | 15.0  (12.7-22.2) | 15.0  (11.0-22.5) | 16.0  (12.0-22.0) |
| Aspartate aminotransferase (IU/L) | 24.0  (17.1-31.2) | 24.0  (17.2-29.0) | 23.0  (17.0-30.0) | 25.0  (16.7-31.0) | 23.0  (17.0-29.5) | 22.5  (17.0-29.0) |
| Gamma-glutamyl transferase (IU/L) | 17.0  (14.0-21.2) | 17.0  (15.0-21.0) | 17.0  (14.0-21.0) | 17.0  (15.0-21.0) | 17.0  (15.0-21.0) | 17.0  (14.7-20.0) |
| Systolic blood pressure (mmHg) | 105  (96-117) | 103  (95-122) | 106  (97-120) | 105  (95-113) | 104  (93-115) | 108  (100-117) |
| Diastolic blood pressure (mmHg) | 70  (60-80) | 65  (60-70) | 68  (60-80) | 65  (60-75) | 65  (60-70) | 68  (60-77) |
| *All values ​​for quantitative variables are reported as mean ± standard deviation or median (quartiles 25-75) and qualitative variables as percentages.  ‡Differences in demographic and clinical characteristics between quartiles of extracted amino acid patterns were assessed using One-way ANOVA for quantitative variables and the Chi-square test for qualitative variables.  †There was a significant difference between demographic and clinical characteristics between quartiles of total protein intake and protein intake from animal or plant sources (P-value < 0.05). | | | | | | |

| **Supplementary Table 4.** Dietary intakes of the participants among the quartiles of the amino acid patterns*‡. | | | | | | |
| --- | --- | --- | --- | --- | --- | --- |
|  | Pattern 1 | | Pattern 2 | | Pattern 3 | |
| Quartile 1 | Quartile 4 | Quartile 1 | Quartile 4 | Quartile 1 | Quartile 4 |
| Energy (kcal) | 3282±1106 | 2825±836† | 3209±991 | 3023±1042 | 2961±924 | 3123±927 |
| Total protein (% of energy intake) | 12.2±1.8 | 14.8±2.1† | 13.6±2.2 | 13.6±2.4 | 12.6±1.8 | 14.0±2.5† |
| Total protein (g/kg body weight) | 2.07±0.92 | 2.25±0.81 | 2.28±0.95 | 2.17±0.92 | 2.02±0.82 | 2.37±0.92† |
| Plant-based protein (% of energy intake) | 7.48±1.49 | 5.35±1.06† | 6.89±1.79 | 5.97±1.18† | 5.59±1.02 | 7.37±1.52† |
| Animal-based protein (% of energy intake) | 4.80±1.41 | 9.51±2.37† | 6.74±2.53 | 7.70±2.90† | 7.00±2.23 | 6.65±2.91† |
| Total fat (% of energy intake) | 30.8±5.2 | 33.9±5.3† | 34.2±6.0 | 31.3±5.1† | 32.9±5.5 | 32.2±6.3 |
| Saturated fatty acids (% of energy intake) | 9.2±2.3 | 11.9±2.3† | 10.5±2.6 | 10.2±2.3 | 10.6±2.5 | 9.9±2.5† |
| Monounsaturated fatty acids (% of energy intake) | 9.9±2.0 | 10.6±2.4† | 11.0±2.4 | 10.2±2.0 | 10.2±2.3 | 10.6±2.5 |
| Polyunsaturated fatty acids (% of energy intake) | 6.7±1.7 | 6.5±1.7† | 7.3±2.0 | 6.4±1.7† | 6.5±1.8 | 7.1±2.0 |
| Carbohydrates (% of energy intake) | 59.5±4.9 | 53.3±5.6† | 54.2±6.5 | 57.7±5.4† | 57.3±6.2 | 55.7±6.5† |
| Sodium (mg/1000kcal) | 1532±393 | 1378±428† | 1389±389 | 1530±443† | 1344±382 | 1474±390† |
| Calcium (mg/1000kcal) | 381±76 | 609±121† | 401±103 | 531±156† | 514±147 | 421±101† |
| Zinc (mg/1000kcal) | 4.4±0.9 | 5.1±0.6† | 4.6±0.8 | 4.8±0.8† | 4.3±0.6 | 5.0±0.9† |
| Magnesium (mg/1000kcal) | 162±37 | 157±24 | 150±24 | 167±34† | 149±23 | 165±34† |
| Fiber (g/1000kcal) | 21.0±6.2 | 13.7±4.6† | 15.3±5.3 | 18.7±6.8† | 17.7±5.9 | 17.7±5.8 |
| *All values ​​are reported as mean ± standard deviation.  ‡Differences in dietary intakes between quartiles of extracted amino acid patterns were assessed using the One-way ANOVA test.  †There was a significant difference between quartiles of amino acid patterns (P-value < 0.05). | | | | | | |

| **Supplementary Table 5.** Multi-variable adjusted odds ratio (95% CI) of metabolic dysfunction-associated fatty liver disease across the dietary amino acids quartile. | | | | | |
| --- | --- | --- | --- | --- | --- |
|  | Quartile of amino acid intake as a percentage of total protein intake | | | | P for Trend* |
| Quartile 1 | Quartile 2 | Quartile 3 | Quartile 4 |
| **Valine** |  | | | | |
| Mean intake | 19.81 | 20.90 | 21.92 | 23.48 |  |
| Number of cases/total population | 42/126 | 45/125 | 49/130 | 60/124 |  |
| Final model | 1.00 (Ref) | 1.36 (0.73-2.53) | 1.25 (0.66-2.36) | **2.17 (1.08-4.36)** | 0.05 |
| **Leucine** |  | | | | |
| Mean intake | 7.47 | 7.71 | 7.94 | 8.26 |  |
| Number of cases/total population | 43/129 | 49/125 | 47/127 | 57/124 |  |
| Final model | 1.00 (Ref) | 1.44 (0.77-2.67) | 1.11 (0.57-2.15) | 1.90 (0.97-3.78) | 0.13 |
| **Isoleucine** |  | | | | |
| Mean intake | 4.32 | 4.47 | 4.60 | 4.73 |  |
| Number of cases/total population | 45/127 | 44/124 | 44/128 | 63/124 |  |
| Final model | 1.00 (Ref) | 0.95 (0.51-1.75) | 1.13 (0.58-2.21) | 2.10 (0.99-4.84) | 0.06 |
| **Phenylalanine** |  | | | | |
| Mean intake | 4.49 | 4.62 | 4.74 | 4.87 |  |
| Number of cases/total population | 47/125 | 49/125 | 49/127 | 51/128 |  |
| Final model | 1.00 (Ref) | 0.85 (0.46-1.54) | 1.04 (0.58-1.87) | 0.87 (0.45-1.49) | 0.69 |
| **Tyrosine** |  | | | | |
| Mean intake | 3.30 | 3.44 | 3.60 | 3.83 |  |
| Number of cases/total population | 47/124 | 48/125 | 44/127 | 57/129 |  |
| Final model | 1.00 (Ref) | 1.16 (0.62-2.18) | 0.85 (0.43-1.69) | 1.17 (0.57-2.40) | 0.83 |
| **Tryptophan** |  | | | | |
| Mean intake | 1.08 | 1.13 | 1.17 | 1.22 |  |
| Number of cases/total population | 57/126 | 44/127 | 53/126 | 42/126 |  |
| Final model | 1.00 (Ref) | 0.81 (0.45-1.45) | 0.76 (0.42-1.36) | 0.62(0.34-1.16) | 0.14 |
| **Cysteine** |  | | | | |
| Mean intake | 1.32 | 1.44 | 1.55 | 1.70 |  |
| Number of cases/total population | 43/126 | 56/128 | 45/129 | 52/122 |  |
| Final model | 1.00 (Ref) | 1.52 (0.84-2.75) | 0.99 (0.53-1.87) | 1.60 (0.81-3.14) | 0.38 |
| **Methionine** |  | | | | |
| Mean intake | 1.99 | 2.11 | 2.20 | 2.33 |  |
| Number of cases/total population | 41/126 | 50/125 | 53/125 | 52/129 |  |
| Final model | 1.00 (Ref) | 1.37 (0.74-2.56) | 1.59 (0.82-3.08) | 1.56 (0.73-3.32) | 0.22 |
| **Glutamic** **acid** |  | | | | |
| Mean intake | 19.81 | 20.90 | 21.92 | 23.48 |  |
| Number of cases/total population | 42/126 | 45/125 | 49/130 | 60/124 |  |
| Final model | 1.00 (Ref) | 1.36 (0.73-2.53) | 1.25 (0.66-2.36) | **2.17 (1.08-4.36)** | 0.05 |
| **Aspartic acid** |  | | | | |
| Mean intake | 8.17 | 8.64 | 9.03 | 9.50 |  |
| Number of cases/total population | 65/129 | 52/125 | 52/127 | 27/124 |  |
| Final model | 1.00 (Ref) | 0.85 (0.46-1.55) | 0.72 (0.38-1.35) | **0.29 (0.14-0.57)** | **0.01** |
| **Lysine** |  | | | | |
| Mean intake | 5.47 | 6.00 | 6.42 | 6.88 |  |
| Number of cases/total population | 55/125 | 41/126 | 49/126 | 51/128 |  |
| Final model | 1.00 (Ref) | **0.48 (0.25-0.92)** | 0.76 (0.38-1.54) | 0.63 (0.26-1.49) | 0.60 |
| **Histidine** |  | | | | |
| Mean intake | 2.40 | 2.49 | 2.55 | 2.65 |  |
| Number of cases/total population | 52/125 | 52/126 | 45/125 | 47/129 |  |
| Final model | 1.00 (Ref) | 0.75 (0.41-1.37) | 0.57 (0.30-1.08) | 0.60 (0.22-1.20) | 0.10 |
| **Arginine** |  | | | | |
| Mean intake | 4.82 | 5.13 | 5.43 | 5.86 |  |
| Number of cases/total Population | 56/127 | 48/125 | 60/126 | 32/127 |  |
| Final model | 1.00 (Ref) | 0.72 (0.40-1.29) | 1.06 (0.59-1.91) | **0.39 (0.20-0.76)** | **0.03** |
| **Serine** |  | | | | |
| Mean intake | 4.69 | 4.94 | 5.09 | 5.33 |  |
| Number of cases/total population | 48/124 | 43/127 | 56/127 | 49/127 |  |
| Final model | 1.00 (Ref) | 0.72 (0.39-1.32) | 1.06 (0.59-1.92) | 0.79 (0.42-1.48) | 0.78 |
| **Threonine** |  | | | | |
| Mean intake | 3.52 | 3.69 | 3.79 | 3.92 |  |
| Number of cases/total population | 56/126 | 39/126 | 55/127 | 46/126 |  |
| Final model | 1.00 (Ref) | **0.40 (0.21-0.76)** | 0.79 (0.41-1.51) | 0.59 (0.28-1.25) | 0.53 |
| **Alanine** |  | | | | |
| Mean intake | 4.14 | 4.32 | 4.50 | 4.70 |  |
| Number of cases/total population | 54/125 | 47/127 | 47/128 | 48/125 |  |
| Final model | 1.00 (Ref) | 0.64 (0.35-1.55) | 0.70 (0.38-1.27) | 0.81 (0.43-1.51) | 0.55 |
| **Glycine** |  | | | | |
| Mean intake | 3.42 | 3.66 | 3.86 | 4.17 |  |
| Number of cases/total population | 45/126 | 60/126 | 49/127 | 42/126 |  |
| Final model | 1.00 (Ref) | 1.42 (0.80-1.52) | 0.87 (0.48-1.58) | 0.91 (0.49-1.69) | 0.48 |
| **Proline** |  | | | | |
| Mean intake | 6.68 | 7.25 | 7.67 | 8.45 |  |
| Number of cases/total population | 37/124 | 49/125 | 53/131 | 57/125 |  |
| Final model | 1.00 (Ref) | 1.55 (0.83-2.91) | **2.12 (1.14-3.92)** | 1.56 (0.82-2.95) | 0.10 |
| Obtained by Logistic regression analysis.  * P-trend was obtained using a quartile of dietary exposure as an ordinal variable in the model.  Significant p-values are highlighted in bold.  In the final model, age, gender, body mass index for age z-score, pubertal status, triglycerides, Homeostatic Model Assessment for Insulin Resistance, physical activity, energy intake, percentage of total protein intake, fiber intake (grams per 1000 kcal), and saturated fatty acid (percentage of total energy) were adjusted as confounders. | | | | | |

| **Supplementary Table 6.** Multi-variable adjusted odds ratio (95% CI) of metabolic dysfunction-associated fatty liver disease across the dietary amino acid groups quartile. | | | | | |
| --- | --- | --- | --- | --- | --- |
|  | Quartile of amino acid group intake as a percentage of total protein intake | | | | P for Trend* |
| Quartile 1 | Quartile 2 | Quartile 3 | Quartile 4 |
| **Branched-chain amino acids** |  | | | | |
| Mean intake | 16.98 | 17.51 | 18.09 | 18.80 |  |
| Number of cases/total population | 45/126 | 44/125 | 43/126 | 64/127 |  |
| Final model | 00/1 (Ref) | 1.03 (0.56-1.88) | 0.96 (0.48-1.90) | 1.81 (0.91-3.62) | 0.10 |
| **Aromatic amino acids** |  | | | | |
| Mean intake | 8.99 | 9.28 | 9.48 | 9.78 |  |
| Number of cases/total population | 53/125 | 41/123 | 41/127 | 61/130 |  |
| Final model | 00/1 (Ref) | 0.70 (0.38-1.29) | 0.55 (0.29-1.03) | 1.03 (0.55-1.92) | 0.93 |
| **Sulfur-containing amino acids** |  | | | | |
| Mean intake | 3.50 | 3.62 | 3.71 | 3.83 |  |
| Number of cases/total population | 40/127 | 39/126 | 55/126 | 62/125 |  |
| Final model | 00/1 (Ref) | 0.87 (0.46-1.62) | **2.11 (1.16-3.86)** | **1.96 (1.01-3.77)** | **0.01** |
| **Acidic amino acids** |  | | | | |
| Mean intake | 28.86 | 29.98 | 30.79 | 32.06 |  |
| Number of cases/total population | 52/127 | 45/126 | 45/127 | 54/125 |  |
| Final model | 00/1 (Ref) | 0.70 (0.38-1.28) | 0.81 (0.43-1.50) | 0.99 (0.49-1.99) | **0.04** |
| **Alkaline amino acids** |  | | | | |
| Mean intake | 13.00 | 13.77 | 14.34 | 15.05 |  |
| Number of cases/total population | 56/125 | 48/125 | 52/128 | 40/127 |  |
| Final model | 00/1 (Ref) | 0.66 (0.35-1.24) | 0.74 (0.37-1.45) | **0.41 (0.19-0.88)** | 0.90 |
| **Alcoholic amino acids** |  | | | | |
| Mean intake | 8.34 | 8.64 | 8.87 | 9.16 |  |
| Number of cases/total population | 50/125 | 45/126 | 47/125 | 54/129 |  |
| Final model | 00/1 (Ref) | 0.89 (0.48-1.64) | 0.88 (0.47-1.67) | 0.92 (0.48-1.78) | 0.84 |
| Obtained by Logistic regression analysis.  * P-trend was obtained using a quartile of dietary exposure as an ordinal variable in the model.  Significant p-values are highlighted in bold.  In the final model, age, gender, body mass index for age z-score, pubertal status, triglycerides, Homeostatic Model Assessment for Insulin Resistance, physical activity, energy intake, percentage of total protein intake, fiber intake (grams per 1000 kcal), and saturated fatty acid (percentage of total energy) were adjusted as confounders. | | | | | |
